# Supplementary material for: On the nature of the stabilisation of the E⋯π pnicogen bond in the SbCl3⋯toluene complex
Source: Royal Society of Chemistry journal article supplement (doi:10.1039/c5cc10363k), 2016-01-01
Supplement: c5cc10363k1.pdf [file c5cc10363k1.pdf]

*Supporting Information*

**On the nature of the stabilisation of the E... $\pi$  pnictogen bond in the  
SbCl<sub>3</sub>...toluene complex**

Rabindranath Lo,<sup>[a]</sup> Petr Švec,<sup>[b]</sup> Zdeňka Růžicková,<sup>[b]</sup> Aleš Růžicka,<sup>[b]</sup> and Pavel Hobza<sup>\*[a,c]</sup>

*[a] Institute of Organic Chemistry and Biochemistry, Academy of Sciences of the Czech Republic, v.v.i.,  
Flemingovo nám. 2, 166 10 Prague 6, Czech Republic; E-mail: hobza@uochb.cas.cz*

*[b] Department of General and Inorganic Chemistry, Faculty of Chemical Technology, University of  
Pardubice, Studentská 573, CZ-532 10, Pardubice, Czech Republic.*

*[c] Regional Centre of Advanced Technologies and Materials, Department of Physical Chemistry,  
Palacký University, 771 46 Olomouc, Czech Republic*

**TABLE OF CONTENTS:**

|                          |         |
|--------------------------|---------|
| QM Calculations.....     | page S2 |
| Synthetic procedure..... | page S2 |
| Crystallography.....     | page S2 |
| References.....          | page S6 |

## QM Calculations

All the structures considered in this study were optimised at the DFT-D3/BLYP/def2-TZVPP level of theory with the TURBOMOLE 6.4 suite of programs.<sup>[1]</sup> Grimme's advanced dispersion-corrected approach<sup>[2]</sup> (DFT-D3) with the def2-TZVPP basis set was chosen, as it efficiently considers the effective-core potentials for Sb atoms.<sup>[3]</sup> Frequency calculations were performed for all the geometries to characterise them as minima with no imaginary frequency. The electrostatic potentials were generated on the molecular surfaces defined by Bader et al.,<sup>[4]</sup> as the 0.001 a.u. (electrons/bohr<sup>3</sup>) contour of the electron density. The most positive value of the potentials (the local maximum) can be characterised as well as measured on the molecular surfaces and is designated as  $V_{s,max}$ . In this study, the electrostatic potentials were calculated at the HF/def2-QZVP level of theory using Gaussian09<sup>[5]</sup> and Molekel4.3<sup>[6]</sup> programs. Natural bond order (NBO) analysis was performed at BLYP/def2-TZVPP level from NBO 3.1 program<sup>[7]</sup> as implemented in Gaussian 09 using the optimized geometries. Noncovalent interaction (NCI) index calculations were done using the Multiwfn program<sup>[8]</sup> and graphical representation was displayed with the VMD program.<sup>[9]</sup> The interaction energy was decomposed by using the density functional theory-based symmetry-adapted perturbation theory (DFT-SAPT). The inaccurate energies of the virtual orbitals attained from DFT method were corrected by a gradient-controlled shift procedure. To obtain the desired shift value, PBE1PBE/aug-cc-pVDZ and PBE1PBE/def2-TZVP level of theory were taken in this study. The DFT part was treated using the localized and asymptotically corrected LPBE0AC exchange correlation functional and the aug-cc-pVDZ basis set. For, Sb atom, aug-cc-pVDZ-PP basis set has been chosen. Larger basis set (e.g., aug-cc-pVTZ) has been used to take the account of energetic values, which is underestimated in the dispersion term.

## Synthetic procedure

0.55 g of SbCl<sub>3</sub> was mixed together with 0.138 mL hexafluorobenzene in toluene (ca. 5-6 mL) and ultrasonicated for 30 min. Crystals of adduct were obtained in freezer at -28°C - m. p. - 23°C, yield ~ 65%.

## Crystallography

The X-ray data for colorless crystals of toluene-SbCl<sub>3</sub> adduct were obtained at -28°C and measured at 150 K using Oxford Cryostream low-temperature device on a Nonius KappaCCD diffractometer with Mo K $\alpha$  radiation ( $\lambda = 0.71073$  Å), a graphite monochromator, and the  $\phi$  and  $\chi$  scan mode. Data reductions were performed with DENZO-SMN<sup>[10]</sup>. The absorption was

corrected by integration methods<sup>[11]</sup>. Structure was primarily solved by direct methods (Sir92)<sup>[12]</sup> and refined by full matrix leastsquares based on  $F^2$  (SHELXL97)<sup>[13]</sup>. Hydrogen atoms were mostly localized on a difference Fourier map, however to ensure uniformity of treatment of crystal, all hydrogen were recalculated into idealized positions (riding model) and assigned temperature factors  $H_{iso}(H) = 1.2U_{eq}(\text{pivot atom})$  or of  $1.5U_{eq}$  for the methyl moiety with  $C-H = 0.96$  and  $0.93 \text{ \AA}$  for methyl and hydrogen atoms in aromatic ring, respectively. CCDC Nr. 1432791.

**Table S1:** Crystallographic data for toluene-SbCl<sub>3</sub> adduct.

|                                                |                                                     |
|------------------------------------------------|-----------------------------------------------------|
| empirical formula                              | Cl <sub>3</sub> Sb (C <sub>7</sub> H <sub>8</sub> ) |
| crystal system                                 | triclinic                                           |
| space group                                    | <i>P</i> -1                                         |
| <i>a</i> [Å]                                   | 7.4330(6)                                           |
| <i>b</i> [Å]                                   | 11.8310(8)                                          |
| <i>c</i> [Å]                                   | 12.3401(14)                                         |
| $\alpha$ [°]                                   | 75.797(7)                                           |
| $\beta$ [°]                                    | 83.716(8)                                           |
| $\gamma$ [°]                                   | 89.257(6)                                           |
| <i>Z</i>                                       | 4                                                   |
| $\mu$ [mm <sup>-1</sup> ]                      | 3.343                                               |
| $D_x$ [Mg m <sup>-3</sup> ]                    | 2.034                                               |
| cryst size [mm]                                | 0.59 x 0.52 x 0.43                                  |
| $\theta$ range [deg]                           | 2.14 - 27.35                                        |
| $T_{min}$ , $T_{max}$                          | 0.279, 0.391                                        |
| no. of reflns measd                            | 17254                                               |
| no. of unique reflns, $R_{int}^a$              | 17191, 0.0959                                       |
| no. of obsd reflns [ $I > 2\sigma(I)$ ]        | 4203                                                |
| no. of params                                  | 199                                                 |
| $S^b$ all data                                 | 1.185                                               |
| final $R^c$ indices [ $I > 2\sigma(I)$ ]       | 0.0395                                              |
| $wR^{2c}$ indices (all data)                   | 0.1064                                              |
| $\Delta\rho$ , max., min. [e Å <sup>-3</sup> ] | 1.678, -2.049                                       |

$$^a R_{\text{int}} = \Sigma |F_o^2 - F_{o,\text{mean}}^2| / \Sigma F_o^2, \quad ^b S = [\Sigma(w(F_o^2 - F_c^2)^2) / (N_{\text{diffs}} - N_{\text{params}})]^{1/2}, \quad ^c R(F) = \Sigma ||F_o| - |F_c|| / \Sigma |F_o|, \quad wR(F^2) = [\Sigma(w(F_o^2 - F_c^2)^2) / (\Sigma w(F_o^2)^2)]^{1/2}.$$

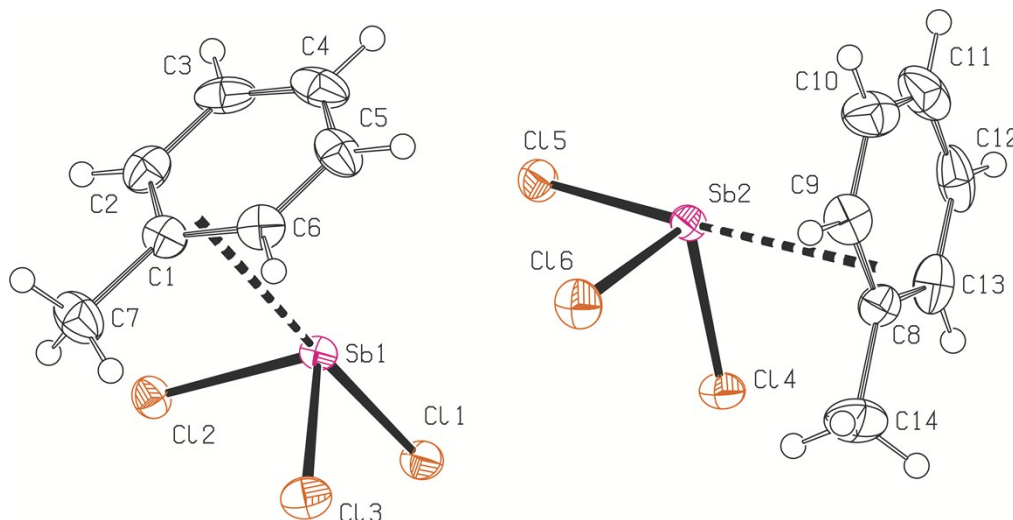

**Fig. S1:** Structure of toluene-SbCl<sub>3</sub> adduct - ORTEP view - 50% probability level.

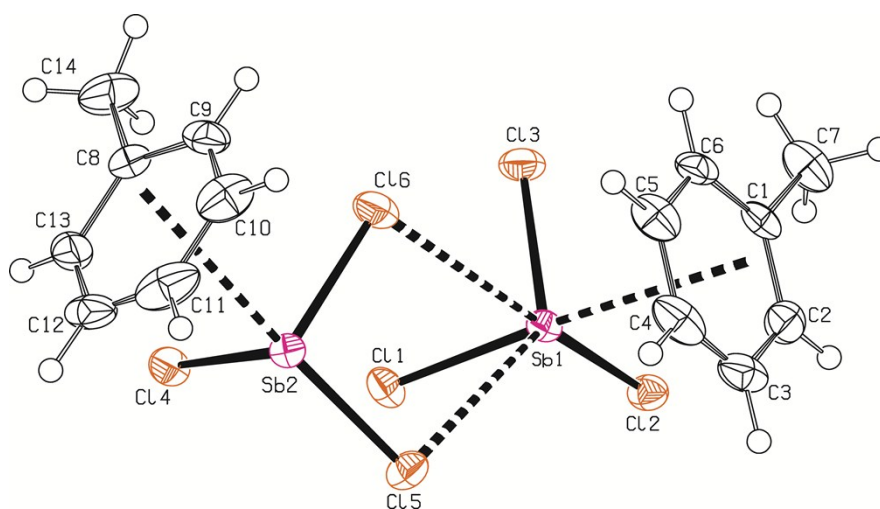

**Fig. S2:** Structure of toluene-SbCl<sub>3</sub> adduct - including selected intramolecular Sb-Cl short contacts - ORTEP view - 50% probability level.

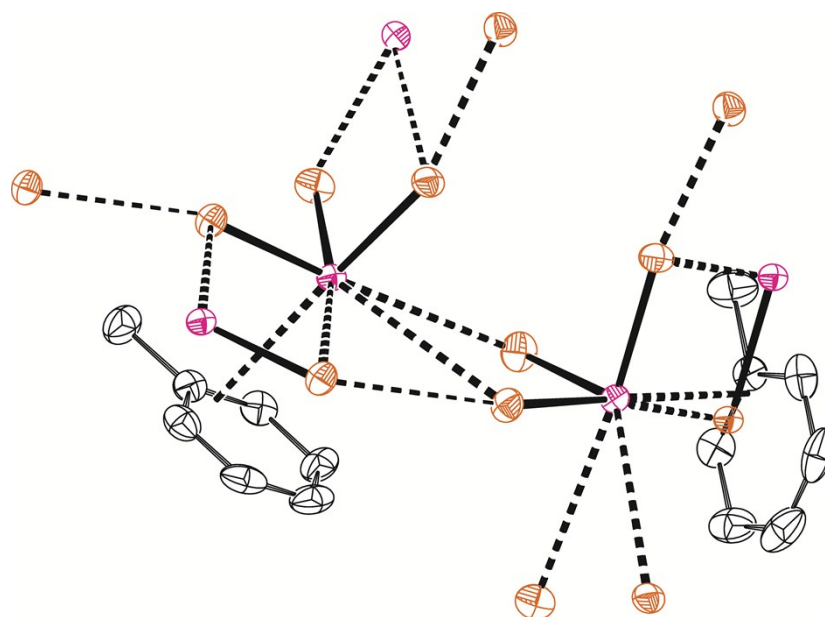

**Fig. S3:** Structure of toluene-SbCl<sub>3</sub> adduct - including selected intramolecular Sb-Cl and Cl-Cl short contacts - ORTEP view - 50% probability level.

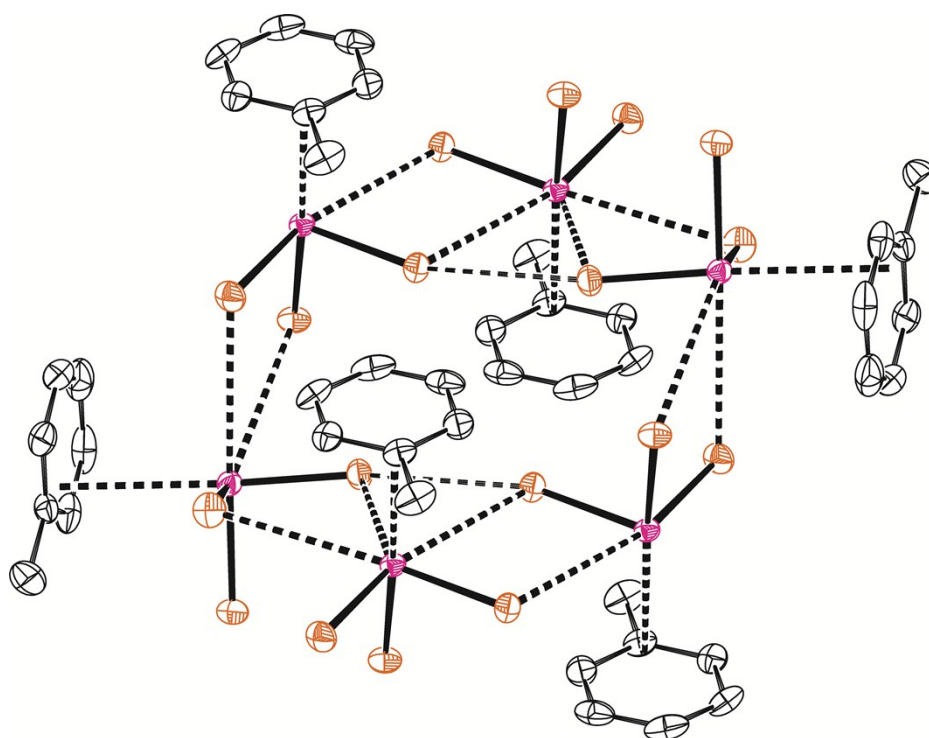

**Fig. S4:** Structure of toluene-SbCl<sub>3</sub> adduct - including selected intramolecular Sb-Cl and Cl-Cl short contacts - ORTEP view - 50% probability level.

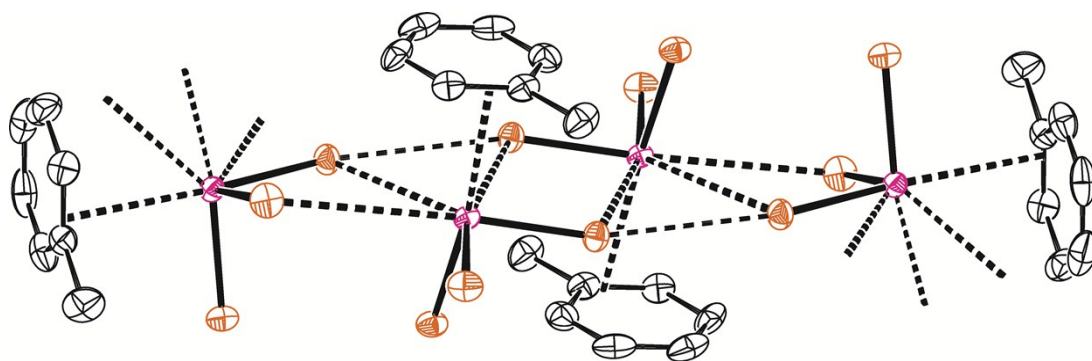

**Fig. S5:** Structure of toluene-SbCl<sub>3</sub> adduct - including selected intramolecular Sb-Cl and Cl-Cl short contacts - ORTEP view - 50% probability level.

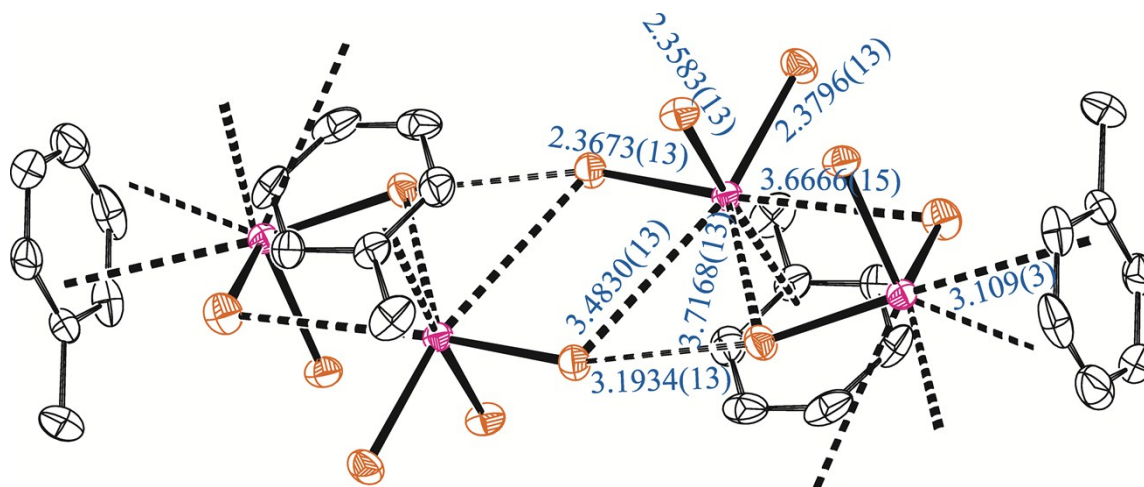

**Fig. S6:** Structure of toluene-SbCl<sub>3</sub> adduct - including selected intramolecular Sb-Cl and Cl-Cl short contacts and its lengths - ORTEP view - 50% probability level.

## References

- [1] TURBOMOLE 6.4; Universität Karlsruhe, 2012, <http://www.turbomole.com>
- [2] S. Grimme, J. Antony, S. Ehrlich, H. Krieg, *J. Chem. Phys.*, 2010, **132**, 154104.
- [3] F. Weigend, R. Ahlrichs, *Phys. Chem. Chem. Phys.* 2005, **7**, 3297.
- [4] R. F. W. Bader, M. Carroll, J. R. Cheeseman, C. Chang, *J. Am. Chem. Soc.*, 1987, **109**, 7968.
- [5] Gaussian 09, Revision D.01, M. J. Frisch, G. W. Trucks, H. B. Schlegel, G. E. Scuseria, M. A. Robb, J. R. Cheeseman, G. Scalmani, V. Barone, B. Mennucci, G. A. Petersson, et al. Gaussian, Inc., Wallingford CT, **2009**.
- [6] a) MOLEKEL 4.3, P. Flükiger, H.P. Lüthi, S. Portmann, J. Weber, Swiss Center for Scientific Computing, Manno (Switzerland), 2000-2002; b) S. Portmann, H. P. Lüthi. MOLEKEL: CHIMIA, **2007**, 28, 555-569.
- [7] NBO Version 3.1, E. D. Glendening, A. E. Reed, Eds.

- [8] T. Lu, Multiwfn: A Multifunctional Wavefunction Analyzer, Version 3.0.1, [Http://Multiwfn.Codeplex.Com](http://Multiwfn.Codeplex.Com), 2013.
- [9] W. Humphrey, A. Dalke, K. Schulten, Vmd: Visual Molecular Dynamics. *J. Mol. Graphics* 1996, **14**, 33.
- [10] Z. Otwinowski, W. Minor, *Methods in Enzymology* 1997, **276**, 307.
- [11] P. Coppens In: F.R. Ahmed, S.R. Hall and C.P. Huber Editors, Crystallographic Computing, **1970**, pp. 255 – 270, Copenhagen, Munksgaard.
- [12] A. Altomare, G. Cascarano, C. Giacovazzo, A. Guagliardi, *Journal of Applied Crystallography* 1994, **27**, 1045.
- [13] G. M. Sheldrick, SHELXL-97, University of Göttingen: Göttingen, **2008**.

## Cartesian coordinates of optimized geometries

### 2b

|    |             |             |             |
|----|-------------|-------------|-------------|
| Sb | 3.572569996 | 7.483531660 | 1.876876436 |
| Cl | 2.015483777 | 5.900334262 | 0.957742597 |
| Cl | 2.238583001 | 8.213475207 | 3.740506611 |
| Cl | 3.100006280 | 9.318030194 | 0.394241854 |
| C  | 4.236365112 | 4.808701174 | 4.040805778 |
| C  | 4.875424194 | 4.227833652 | 2.928714420 |
| C  | 4.938177038 | 5.789987238 | 4.770044377 |
| C  | 6.234958032 | 6.172389536 | 4.404978420 |
| C  | 2.842829557 | 4.387025405 | 4.457616050 |
| C  | 6.858326893 | 5.581969860 | 3.296739589 |
| C  | 6.173098040 | 4.608221310 | 2.559287017 |
| H  | 4.346087386 | 3.478706953 | 2.342587895 |
| H  | 4.455608098 | 6.264129584 | 5.622955003 |
| H  | 6.756052936 | 6.933482973 | 4.982784547 |
| H  | 2.324833613 | 3.860146786 | 3.649527049 |
| H  | 2.236233508 | 5.255677655 | 4.740298814 |
| H  | 2.885224507 | 3.716547410 | 5.327237172 |
| H  | 7.865043468 | 5.879536046 | 3.010607311 |
| H  | 6.645004567 | 4.145653097 | 1.694399059 |

### 2C

|    |              |              |              |
|----|--------------|--------------|--------------|
| C  | -1.185292576 | -1.356849199 | 2.257533571  |
| C  | -1.192173524 | 0.010670590  | 2.569659508  |
| C  | 0.007999823  | 0.726294534  | 2.719905694  |
| C  | 1.222109179  | 0.032563714  | 2.547373671  |
| C  | 1.236410937  | -1.331481645 | 2.236248039  |
| C  | 0.029710365  | -2.033400259 | 2.087937208  |
| Sb | -0.109136704 | -0.606951309 | -1.120242995 |
| Cl | 0.054487943  | 0.505356567  | -3.248828719 |
| Cl | 1.333257727  | -2.467179597 | -1.601104379 |
| Cl | -2.216698466 | -1.704843842 | -1.471106884 |
| C  | 0.009528593  | 2.201680079  | 3.065611617  |
| H  | 2.163832125  | 0.569321899  | 2.658312746  |
| H  | 2.184163850  | -1.847269419 | 2.097245499  |
| H  | 0.038825293  | -3.091115860 | 1.835919798  |
| H  | -2.126123346 | -1.888398951 | 2.134321387  |



|   |              |             |             |
|---|--------------|-------------|-------------|
| H | -2.142880656 | 0.526665406 | 2.696591397 |
| H | -1.007142341 | 2.607295201 | 3.111178070 |
| H | 0.573431761  | 2.783262104 | 2.324238651 |
| H | 0.485690016  | 2.375379986 | 4.040206123 |

## 2d

|    |              |              |             |
|----|--------------|--------------|-------------|
| C  | -0.030723024 | 2.282194591  | 8.735149653 |
| C  | 0.691622001  | 1.260504646  | 8.100268267 |
| C  | 1.031946387  | 1.380295913  | 6.744685467 |
| C  | 0.648908038  | 2.521199417  | 6.024011423 |
| C  | -0.074130324 | 3.540401500  | 6.658406998 |
| C  | -0.413965291 | 3.421053924  | 8.013906647 |
| Sb | -2.374646065 | 0.158862791  | 6.630872994 |
| Cl | -1.190803889 | -1.320146169 | 5.154403247 |
| Cl | -4.612241425 | -0.422495090 | 5.970945470 |
| Cl | -2.257001348 | -1.174412934 | 8.625039488 |
| H  | 1.581258272  | 0.582748607  | 6.249952913 |
| H  | 0.911950557  | 2.612177975  | 4.972096423 |
| H  | -0.370527669 | 4.425816311  | 6.099388765 |
| H  | -0.974382579 | 4.213747534  | 8.505779662 |
| H  | -0.297574843 | 2.184985012  | 9.785413888 |
| H  | 0.978545201  | 0.371115971  | 8.656491696 |
